# Supplementary material for: Structural complexities and sodium-ion diffusion in the intercalates NaxTiS2: move it, change it, re-diffract it
Source: Royal Society of Chemistry journal article supplement (doi:10.1039/c9ra05690d), 2019-01-01
Supplement: c9ra05690d1.pdf [file c9ra05690d1.pdf]

# Structural complexities and sodium-ion diffusion in the intercalates $\text{Na}_x\text{TiS}_2$ : move it, change it, re-diffract it

## Electronic Supplementary Information (ESI)

Dennis Wiedemann, <sup>\*a</sup> Emmanuelle Suard <sup>b</sup> and Martin Lerch <sup>a</sup>

<sup>a</sup>Technische Universität Berlin, Institut für Chemie, Berlin, 10623, Germany. E-mail: [dennis.wiedemann@chem.tu-berlin.de](mailto:dennis.wiedemann@chem.tu-berlin.de)

<sup>b</sup>Institut Laue-Langevin, Grenoble, 38042, France

### Content

|   |                                      |   |
|---|--------------------------------------|---|
| 1 | Details on X-ray diffraction.....    | 2 |
| 2 | Details on neutron diffraction ..... | 4 |
| 3 | ICSD corrections.....                | 7 |
| 4 | References .....                     | 7 |

## 1 Details on X-ray diffraction

Measurement was carried out at ambient temperature on a “PANalytical X’Pert PRO MPD” diffractometer equipped with a “PIXcel” detector using nickel-filtered Cu- $K\alpha$  radiation ( $\lambda_1 = 1.54056 \text{ \AA}$ ,  $\lambda_2 = 1.54439 \text{ \AA}$ ,  $I_2/I_1 = 0.5$ ) in Bragg–Brentano ( $\theta$ – $\theta$ ) geometry. Initial Le-Bail fits and following calculations were carried out using JANA2006.<sup>1</sup> Peak profiles were fitted with a pseudo-Voigt function using the Thompson–Cox–Hastings approach (Gaussian parameters  $U$ ,  $V$ , and  $W$ ; Lorentzian parameter  $X$ ).<sup>2</sup> Asymmetry was corrected for using the Bérar–Baldinozzi method with four parameters.<sup>3</sup> Displacement and transparency corrections were refined. The background was modelled using 15 Legendre polynomials between manually defined points. A scale factor and two parameters for roughness correction according to Pitschke, Hermann, and Mattern were employed.<sup>4</sup> Atomic displacements were refined with an isotropic model.

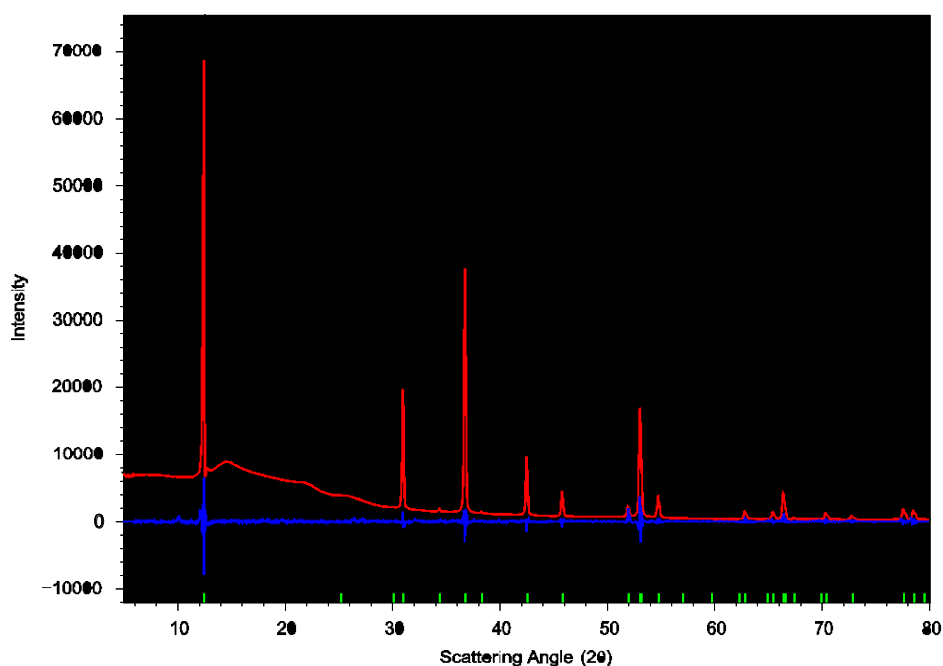

**Fig. S1** X-ray diffractogram of Na<sub>0.5</sub>TiS<sub>2</sub>-3R<sub>1</sub> with results of Rietveld refinement ( $R_p = 0.0363$ ,  $wR_p = 0.0621$ ,  $R_{exp} = 0.0186$ ,  $R_F = 0.0428$ ,  $R_I = 0.0660$ ). Red: calculated, black: observed, blue: difference density; green: Bragg positions.

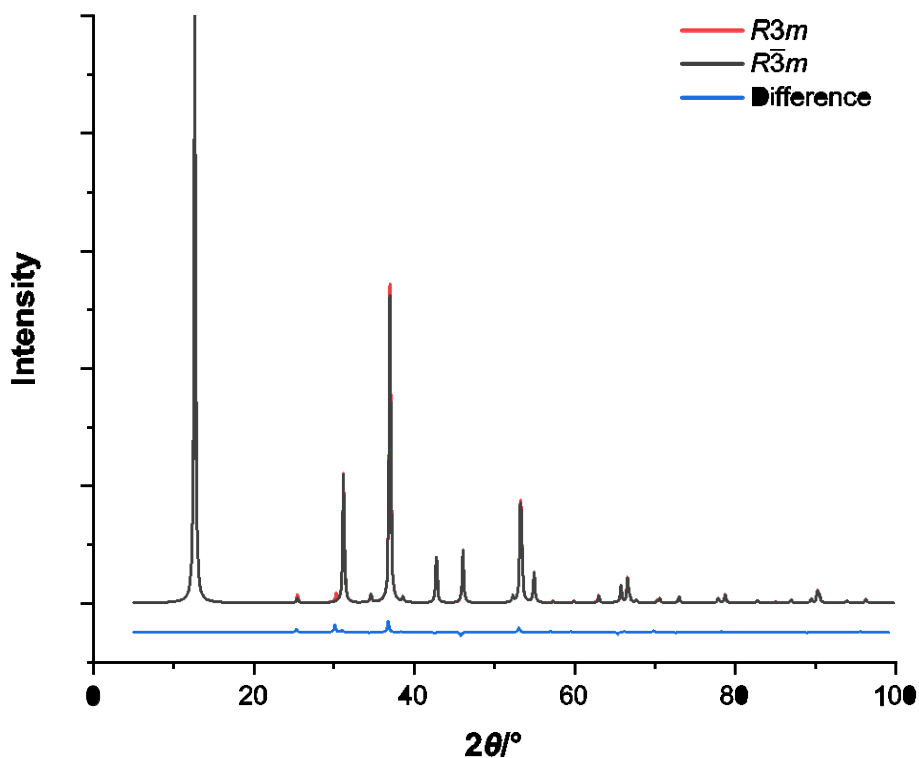

**Fig. S2** Comparison of the X-ray diffractograms simulated for  $\text{Na}_{0.55}\text{TiS}_2\text{-}3R_1$  in  $R3m$  (model from literature) and  $R3m$  (symmetrized by slightly adjusting atomic positions with disordered sodium position) with  $\lambda = 1.54056 \text{ \AA}$  (Cu- $K_{\alpha 1}$ ) and  $f = 0.25^\circ$  (Gaussian profile).

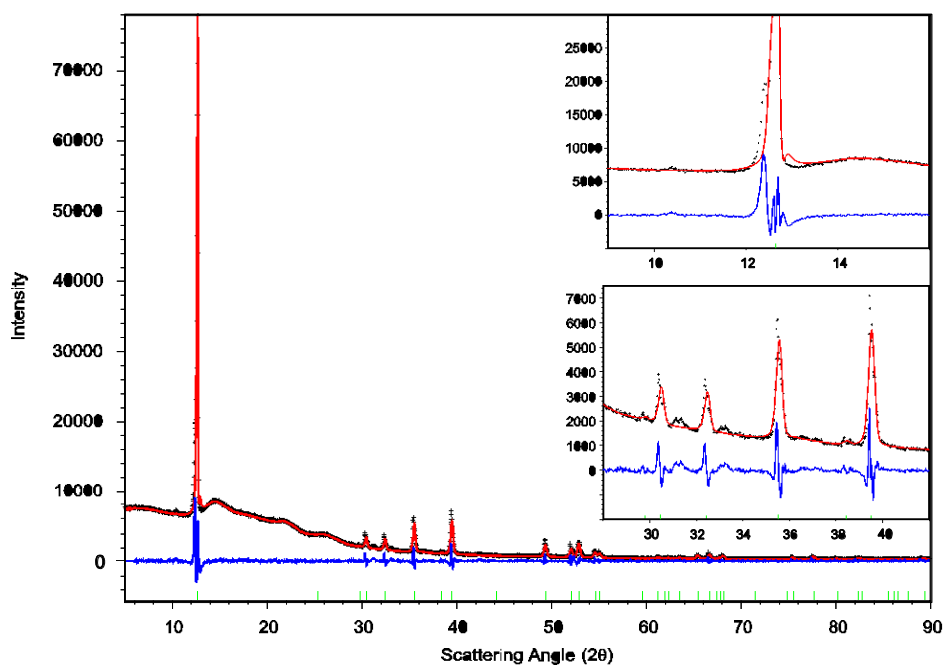

**Fig. S3** X-ray diffractogram of “ $\text{Na}_{0.9}\text{TiS}_2\text{-}2H$ ” with results of Le-Bail fit ( $R_p = 0.0408$ ,  $wR_p = 0.0828$ ). Red: calculated, black: observed, blue: difference density; green: Bragg positions. Insets show details of the low-angle regime. The high relative intensity of the first reflection indicates a strongly preferred orientation along (001). The low overall quality of the fit is due to the neglect of reflections (e.g., a prominent shoulder at ca.  $12.4^\circ$ ) or their features (e.g., splitting at ca.  $30.5$ ,  $32.5$ ,  $35.5$ , and  $39.5^\circ$ ).

## 2 Details on neutron diffraction

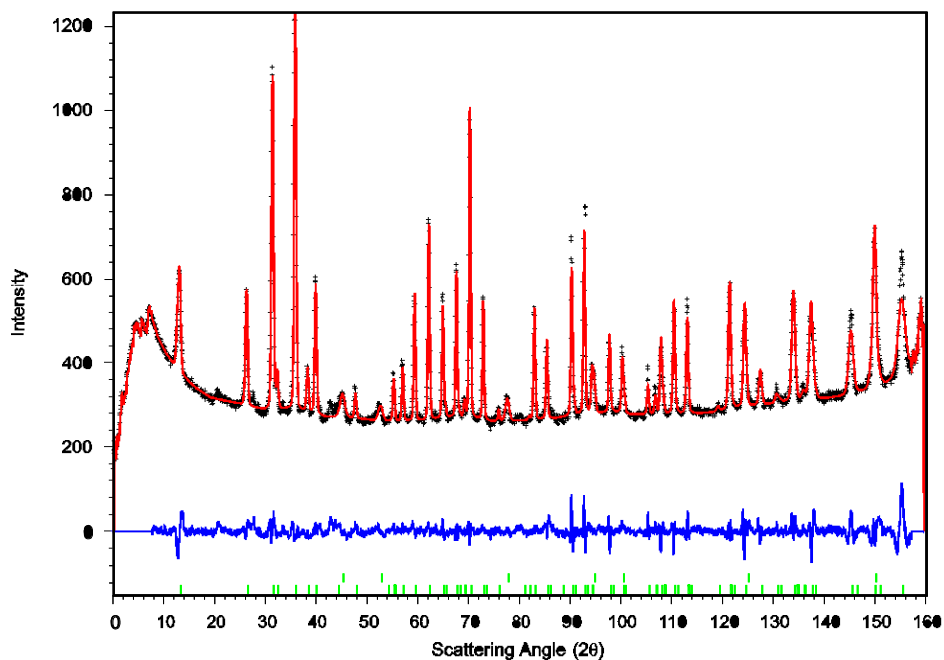

**Fig. S4** Neutron diffractogram of  $\text{Na}_{0.5}\text{TiS}_2-3R_1$  at 19 °C with results of Rietveld refinement. Red: calculated, black: observed, blue: difference density; green: Bragg positions for  $\text{Na}_{0.5}\text{TiS}_2-3R_1$  (bottom) and  $Fm3m$  by-phase (top).

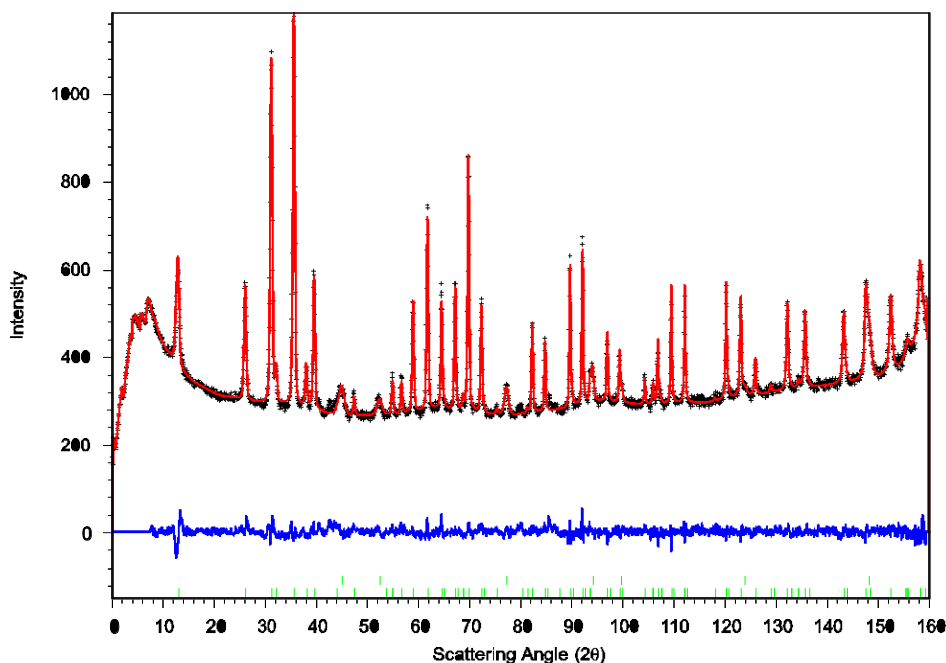

**Fig. S5** Neutron diffractogram of  $\text{Na}_{0.5}\text{TiS}_2-3R_1$  at 300 °C with results of Rietveld refinement. Red: calculated, black: observed, blue: difference density; green: Bragg positions for  $\text{Na}_{0.5}\text{TiS}_2-3R_1$  (bottom) and  $Fm3m$  by-phase (top).

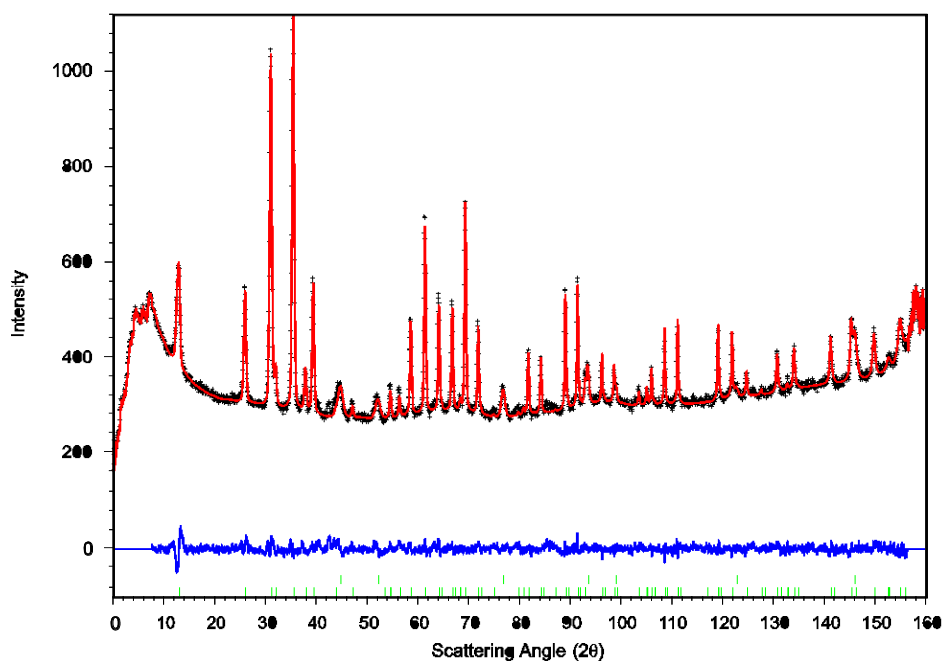

**Fig. S6** Neutron diffractogram of Na<sub>0.5</sub>TiS<sub>2</sub>-3R<sub>1</sub> at 600 °C with results of Rietveld refinement. Red: calculated, black: observed, blue: difference density; green: Bragg positions for Na<sub>0.5</sub>TiS<sub>2</sub>-3R<sub>1</sub> (bottom) and *Fm* $\bar{3}$ *m* by-phase (top).

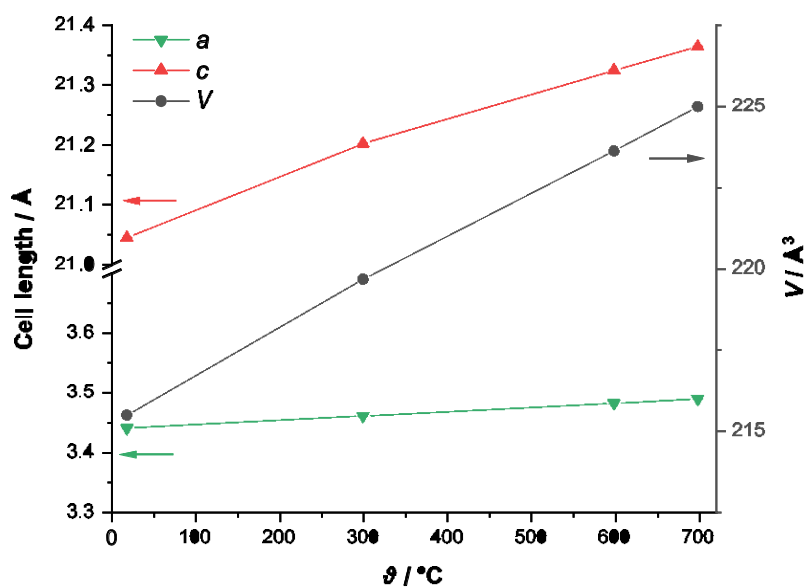

**Fig. S7** Temperature evolution of cell lengths and volume in Na<sub>0.5</sub>TiS<sub>2</sub>-3R<sub>1</sub>. Lines are merely guides to the eye; error bars are smaller than symbols.

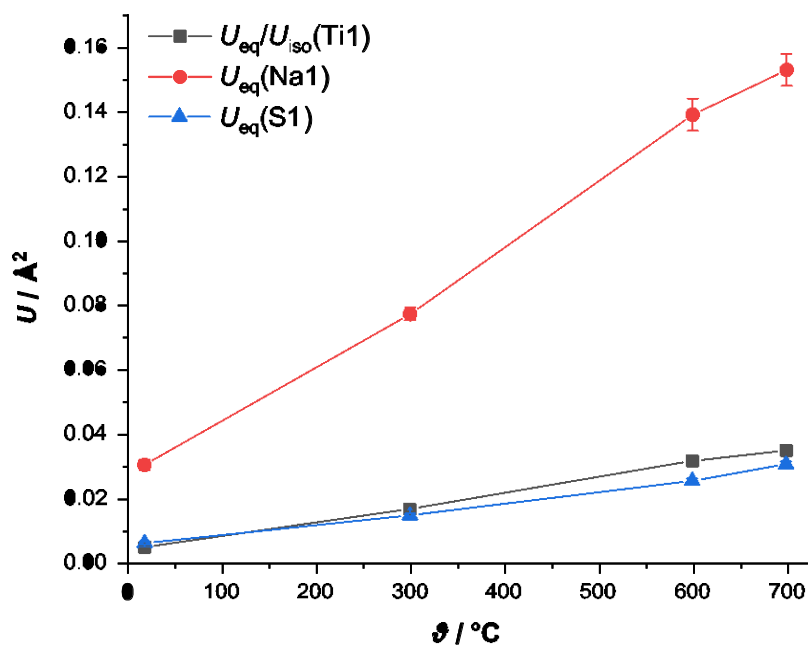

**Fig. S8** Temperature evolution of equivalent displacement parameters in  $Na_{0.5}TiS_2-3R_1$ . Lines are merely guides to the eye; error bars are generally smaller than symbols.

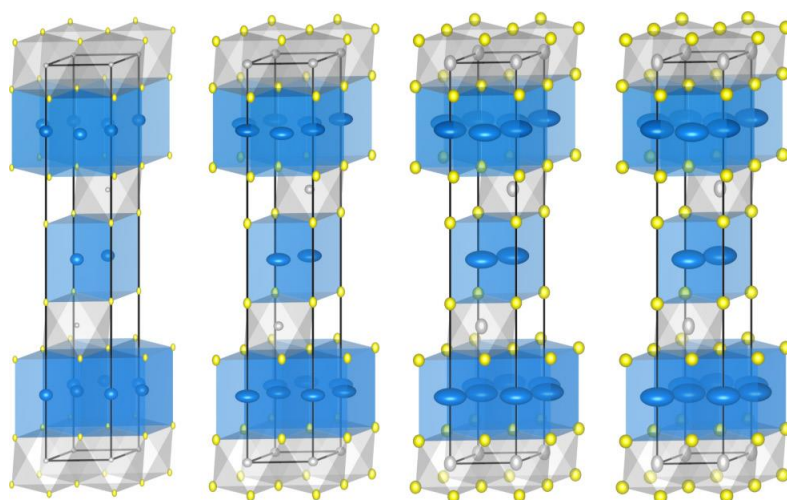

**Fig. S9** Crystal structure of  $Na_{0.5}TiS_2-3R_1$  at 18, 300, 600, and 700 °C (from left to right) according to neutron diffraction. Atoms as ellipsoids of 75% probability (harmonic displacement only); grey: titanium, blue: sodium, yellow: sulphide ions; unit cell in black.

### 3 ICSD Corrections

**Table S1.** Reassignment of isopointal structures with the formerly assigned type “CuCrSe<sub>2</sub>-AgCrSe<sub>2</sub>(R3m)” to alloconfigurational structure types (effective since May 2019).

| ICSD Number | Structured Formula                                                    | Structure Type      | ICSD Number | Structured Formula                                                                               | Structure Type      |
|-------------|-----------------------------------------------------------------------|---------------------|-------------|--------------------------------------------------------------------------------------------------|---------------------|
| 1884        | InSe                                                                  | $\gamma$ -InSe      | 77990       | RbTiS <sub>2</sub>                                                                               | CuCrSe <sub>2</sub> |
| 2308        | InSe                                                                  | $\gamma$ -InSe      | 84639       | CrWN <sub>2</sub>                                                                                | AgCrS <sub>2</sub>  |
| 9992        | Na <sub>0.6</sub> CoO <sub>2</sub>                                    | —                   | 88852       | AuCrS <sub>2</sub>                                                                               | AgCrS <sub>2</sub>  |
| 23002       | InSe                                                                  | $\gamma$ -InSe      | 89454       | (H <sub>0.19</sub> Na <sub>0.06</sub> K <sub>0.25</sub> )CoO <sub>2</sub> · 0.3 H <sub>2</sub> O | —                   |
| 23448       | KSnS <sub>2</sub>                                                     | CuCrSe <sub>2</sub> | 100124      | Na <sub>0.6</sub> VSe <sub>2</sub>                                                               | —                   |
| 23449       | RbSnS <sub>2</sub>                                                    | CuCrSe <sub>2</sub> | 100594      | CuCrS <sub>2</sub>                                                                               | CuCrSe <sub>2</sub> |
| 24796       | CuCrS <sub>2</sub>                                                    | CuCrSe <sub>2</sub> | 100595      | Cu <sub>1.016</sub> Cr <sub>0.91</sub> S <sub>2</sub>                                            | —                   |
| 24797       | AgCrS <sub>2</sub>                                                    | CuCrSe <sub>2</sub> | 161375      | Na <sub>0.62</sub> CoO <sub>2</sub>                                                              | —                   |
| 24798       | CuCrSe <sub>2</sub>                                                   | CuCrSe <sub>2</sub> | 184736      | Na <sub>0.8</sub> (Ni <sub>0.33</sub> Mn <sub>0.33</sub> Co <sub>0.33</sub> )O <sub>2</sub>      | CuCrSe <sub>2</sub> |
| 24799       | AgCrSe <sub>2</sub>                                                   | CuCrSe <sub>2</sub> | 187401      | CuCrSe <sub>2</sub>                                                                              | CuCrSe <sub>2</sub> |
| 25625       | CuCrSe <sub>2</sub>                                                   | CuCrSe <sub>2</sub> | 200983      | Na <sub>0.7</sub> (Cr <sub>0.7</sub> Ti <sub>0.3</sub> )S <sub>2</sub>                           | CuCrSe <sub>2</sub> |
| 25626       | AgCrSe <sub>2</sub>                                                   | AgCrS <sub>2</sub>  | 201396      | TiCrS <sub>2</sub>                                                                               | CuCrSe <sub>2</sub> |
| 25627       | CuCrS <sub>2</sub>                                                    | AgCrS <sub>2</sub>  | 291155      | Na <sub>0.5796</sub> (Mn <sub>0.65</sub> Co <sub>0.18</sub> Ni <sub>0.17</sub> )O <sub>2</sub>   | CuCrSe <sub>2</sub> |
| 25628       | AgCrS <sub>2</sub>                                                    | AgCrS <sub>2</sub>  | 604972      | (Ag <sub>0.5</sub> Cu <sub>0.5</sub> )CrS <sub>2</sub>                                           | CuCrSe <sub>2</sub> |
| 40819       | K <sub>0.6</sub> VS <sub>2</sub>                                      | CuCrSe <sub>2</sub> | 604981      | AgCrS <sub>2</sub>                                                                               | CuCrSe <sub>2</sub> |
| 41477       | InSe                                                                  | $\gamma$ -InSe      | 604993      | AgCrSe <sub>2</sub>                                                                              | CuCrSe <sub>2</sub> |
| 42393       | CuCrS <sub>2</sub>                                                    | CuCrSe <sub>2</sub> | 605002      | AgCrTe <sub>2</sub>                                                                              | CuCrSe <sub>2</sub> |
| 42394       | CuCrS <sub>2</sub>                                                    | CuCrSe <sub>2</sub> | 605616      | AgNiSe <sub>2</sub>                                                                              | CuCrSe <sub>2</sub> |
| 42395       | AgCrS <sub>2</sub>                                                    | CuCrSe <sub>2</sub> | 605619      | AgNiTe <sub>2</sub>                                                                              | CuCrSe <sub>2</sub> |
| 42396       | AgCrS <sub>2</sub>                                                    | CuCrSe <sub>2</sub> | 625764      | CuCrS <sub>2</sub>                                                                               | CuCrSe <sub>2</sub> |
| 42397       | AgCrSe <sub>2</sub>                                                   | CuCrSe <sub>2</sub> | 625799      | CuCrSe <sub>2</sub>                                                                              | CuCrSe <sub>2</sub> |
| 42398       | AgCrSe <sub>2</sub>                                                   | CuCrSe <sub>2</sub> | 626736      | TiCrSe <sub>2</sub>                                                                              | AgCrS <sub>2</sub>  |
| 68423       | AgCrSe <sub>2</sub>                                                   | CuCrSe <sub>2</sub> | 629005      | (CuSb)Te <sub>2</sub>                                                                            | $\gamma$ -InSe      |
| 71092       | Na <sub>0.55</sub> TiS <sub>2</sub>                                   | CuCrSe <sub>2</sub> | 639178      | HgTaS <sub>2</sub>                                                                               | —                   |
| 71932       | LiMoN <sub>2</sub>                                                    | AgCrS <sub>2</sub>  | 640479      | InSe                                                                                             | $\gamma$ -InSe      |
| 73388       | GaSe                                                                  | $\gamma$ -InSe      | 640483      | InSe                                                                                             | $\gamma$ -InSe      |
| 76540       | Na <sub>0.6</sub> (Ti <sub>0.4</sub> V <sub>0.6</sub> )S <sub>2</sub> | CuCrSe <sub>2</sub> | 640505      | InSe                                                                                             | $\gamma$ -InSe      |
| 76542       | Na <sub>0.5</sub> VS <sub>2</sub>                                     | —                   | 640507      | InSe                                                                                             | $\gamma$ -InSe      |
| 76550       | Na <sub>0.6</sub> VSe <sub>2</sub>                                    | CuCrSe <sub>2</sub> | 641335      | KTiS <sub>2</sub>                                                                                | CuCrSe <sub>2</sub> |
| 77596       | Na <sub>0.6</sub> VSe <sub>2</sub>                                    | CuCrSe <sub>2</sub> | 644994      | NaVS <sub>2</sub>                                                                                | —                   |

### 4 References

- 1 V. Petříček, M. Dušek and L. Palatinus, *Z. Kristallogr. – Cryst. Mater.*, 2014, **229**, 345–352.
- 2 P. Thompson, D. E. Cox and J. B. Hastings, *J. Appl. Crystallogr.*, 1987, **20**, 79–83.
- 3 J.-F. Bérar and G. Baldinozzi, *J. Appl. Crystallogr.*, 1993, **26**, 128–129.
- 4 W. Pitschke, H. Hermann and N. Mattern, *Powder Diffr.*, 1993, **8**, 74–83.
